# Supplementary material for: Development of a multicolor upconversion fluorescence immunoassay for the simultaneous detection of thiamethoxam and dextran by magnetic separation
Source: Royal Society of Chemistry journal article supplement (doi:10.1039/d0ra07954e), 2020-12-23
Supplement: d0ra07954e1.pdf [file d0ra07954e1.pdf]

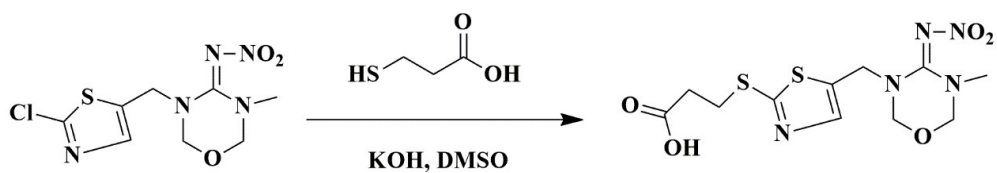

Fig. S1 Synthesis scheme of haptin.

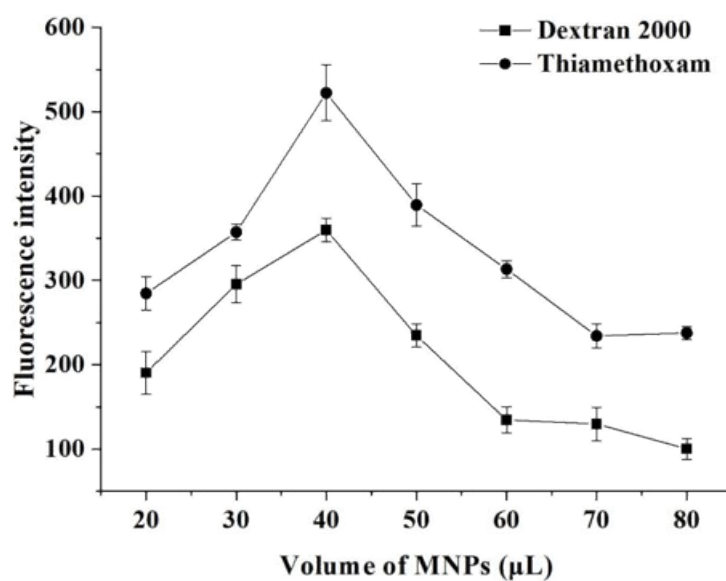

Fig. S2 Effects of different volume of antigen-conjugated MNPs on the multicolor UCFA.

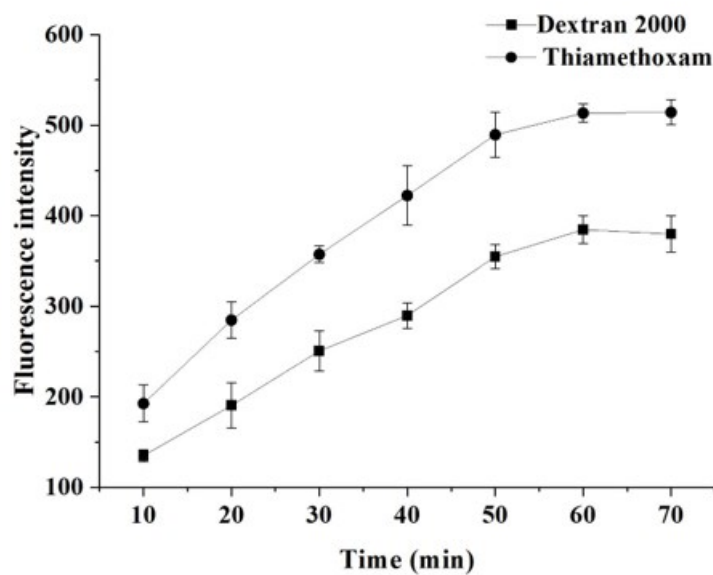

Fig. S3 The effect of different incubation time on the multicolor UCFA.

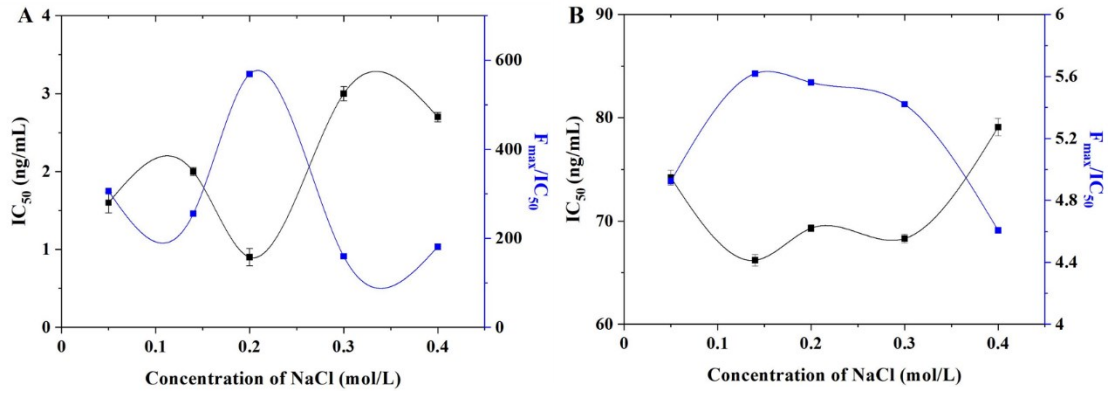

**Fig. S4** Effect of concentration of NaCl on the sensitivity of the multicolor UCFIA: (A) thiamethoxam, (B) dextran 2000.

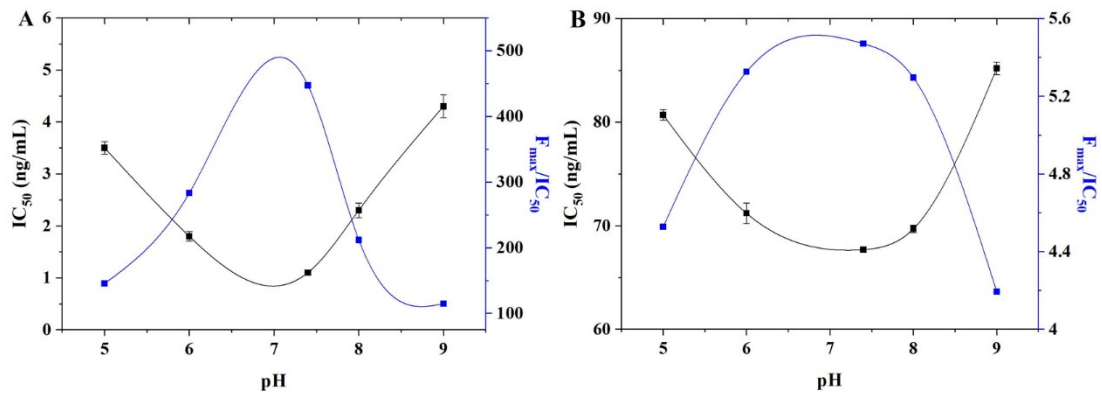

**Fig. S5** Effect of pH on the sensitivity of the multicolor UCFIA: (A) thiamethoxam, (B) Dextran 2000.

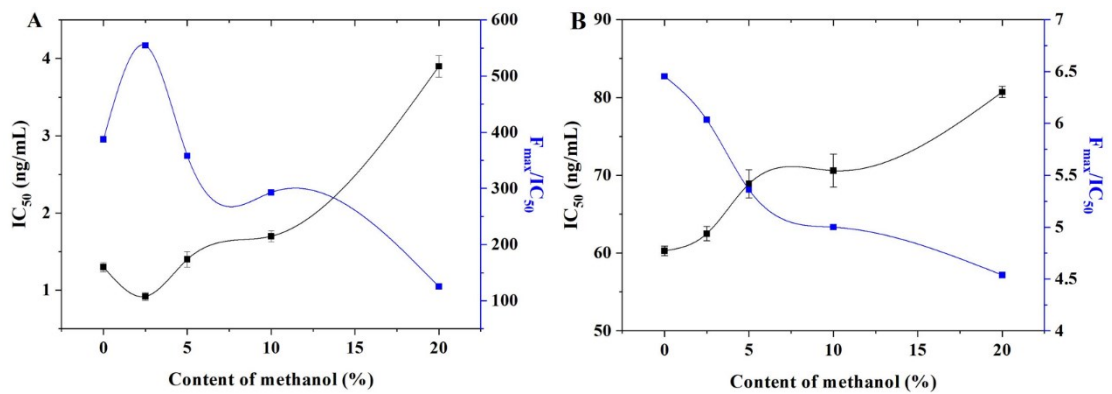

**Fig. S6** Effect of methanol content on the sensitivity of the multicolor UCFIA: (A) thiamethoxam, (B) Dextran 2000.
